# Supplementary material for: Disruption of stomatal lineage signaling or transcriptional regulators has differential effects on mesophyll development, but maintains coordination of gas exchange
Source: PubMed Central journal article supplement (PMC5601202; doi:10.1111/nph.14746), 2017-08-21
Supplement: NPH-216-69-s001.pdf [file NPH-216-69-s001.pdf]

**New Phytologist Supporting Information Tables S1-S3**

**Article Title:** Disruption of stomatal lineage signaling or transcriptional regulators has differential affects on mesophyll development, but maintains coordination of gas-exchange

**Authors:** Graham J. Dow, Joseph A. Berry, Dominique C. Bergmann

**Article Acceptance Date:** July 14, 2017

| Genotype<br>(growth condition) <sup>1</sup> | $g_{smax}$<br>(mol H <sub>2</sub> O m <sup>-2</sup> s <sup>-1</sup> ) | $V_{cmax}$<br>(μmol C m <sup>-2</sup> s <sup>-1</sup> ) | Carbon Isotope Ratio<br>(δ <sup>13</sup> C, ‰) <sup>2</sup> |
|---------------------------------------------|-----------------------------------------------------------------------|---------------------------------------------------------|-------------------------------------------------------------|
| SPCH SIL                                    | 0.452 ± 0.050                                                         | 12.62 ± 0.94                                            | -33.7 ± 0.04                                                |
| Col-0 (low light: 50)                       | 0.689 ± 0.105                                                         | 13.32 ± 1.30                                            | --                                                          |
| Col-0                                       | 0.883 ± 0.044                                                         | 17.48 ± 1.04                                            | -33.9 ± 0.05                                                |
| <i>epf1</i>                                 | 0.923 ± 0.059                                                         | 18.43 ± 2.83                                            | -34.0 ± 0.02                                                |
| SPCH-YFP                                    | 1.106 ± 0.053                                                         | 19.28 ± 0.68                                            | -33.8 ± 0.04                                                |
| SPCH 2-4A                                   | 1.853 ± 0.185                                                         | 22.93 ± 2.27                                            | -34.0 ± 0.06                                                |
| <i>epf1;epf2</i>                            | 1.928 ± 0.122                                                         | 23.19 ± 1.12                                            | -33.8 ± 0.08                                                |
| Col-0 (high light: 200)                     | 2.127 ± 0.088                                                         | 25.31 ± 2.85                                            | --                                                          |

**Table S1. Summary of gas-exchange ( $g_{smax}$ ) and photosynthetic ( $V_{cmax}$ ) capacity among stomatal development mutants and the impact on water-use efficiency (δ<sup>13</sup>C).** All values are mean ± SEM, 4<*n*<8 per genotype; n=6 per genotype for carbon isotope measurements, δ<sup>13</sup>C, which was used to infer intrinsic water-use efficiency ( $W_g$ ). <sup>1</sup>Light conditions for growth were 100 μmol photons m<sup>-2</sup>s<sup>-1</sup>, unless noted otherwise. <sup>2</sup>No significant differences in δ<sup>13</sup>C (P>0.05) were observed between Col-0 and any other genotypes.

| Genotype<br>(Light Intensity) | Adaxial Stomatal<br>Density (mm <sup>-2</sup> ) | Adaxial Epidermal<br>Density (mm <sup>-2</sup> ) | Adaxial<br>Stomatal Index | Palisade Mesophyll<br>Density (mm <sup>-2</sup> ) | Leaf Thickness<br>(μm) | Sixth Leaf<br>Area (cm <sup>2</sup> ) | Number of<br>Plants ( <i>n</i> ) |
|-------------------------------|-------------------------------------------------|--------------------------------------------------|---------------------------|---------------------------------------------------|------------------------|---------------------------------------|----------------------------------|
| Col-0                         | 52.0 ± 1.7                                      | 169.2 ± 4.9                                      | 0.235 ± 0.003             | 276.7 ± 7.3                                       | 138.4 ± 2.7            | 3.34 ± 0.15                           | 8                                |
| Col-0 (Low)                   | 57.6 ± 3.8                                      | 261.0 ± 10.9                                     | 0.179 ± 0.005             | 430.4 ± 19.7                                      | 86.1 ± 3.6             | 1.52 ± 0.17                           | 4                                |
| Col-0 (High)                  | 174.0 ± 4.7                                     | 356.1 ± 8.1                                      | 0.328 ± 0.002             | 539.0 ± 12.0                                      | 219.2 ± 6.1            | 2.51 ± 0.10                           | 4                                |
| SPCH SIL                      | 74.7 ± 3.0                                      | 366.8 ± 10.6                                     | 0.169 ± 0.007             | 351.3 ± 9.6                                       | 124.4 ± 4.1            | 2.19 ± 0.18                           | 8                                |
| SPCH-YFP                      | 69.8 ± 3.6                                      | 236.7 ± 9.3                                      | 0.224 ± 0.006             | 394.6 ± 15.8                                      | 139.5 ± 5.9            | 2.65 ± 0.16                           | 8                                |
| SPCH 2-4A                     | 114.0 ± 2.8                                     | 322.1 ± 9.3                                      | 0.262 ± 0.004             | 250.3 ± 7.0                                       | 151.0 ± 5.8            | 3.52 ± 0.09                           | 8                                |
| <i>epf1</i>                   | 74.0 ± 4.6                                      | 171.0 ± 7.0                                      | 0.300 ± 0.006             | 315.9 ± 9.8                                       | 134.9 ± 7.3            | 2.84 ± 0.10                           | 8                                |
| EPF1 OX                       | 11.4 ± 1.7                                      | 307.3 ± 9.4                                      | 0.035 ± 0.003             | 253.5 ± 9.4                                       | 139.1 ± 7.5            | 3.44 ± 0.36                           | 4                                |
| <i>epf2</i>                   | 111.6 ± 7.4                                     | 308.3 ± 16.0                                     | 0.265 ± 0.004             | 338.7 ± 9.5                                       | 115.0 ± 4.2            | 2.96 ± 0.20                           | 5                                |
| EPF2 OX                       | 23.6 ± 2.2                                      | 147.0 ± 3.6                                      | 0.136 ± 0.008             | 270.7 ± 7.5                                       | 133.9 ± 8.9            | 3.24 ± 0.19                           | 8                                |
| <i>epf1;epf2</i>              | 153.1 ± 3.6                                     | 253.5 ± 7.4                                      | 0.378 ± 0.004             | 361.5 ± 6.3                                       | 132.6 ± 6.9            | 3.02 ± 0.06                           | 8                                |
| STOMAGEN RNAi                 | 27.5 ± 1.1                                      | 155.8 ± 3.4                                      | 0.150 ± 0.004             | 269.9 ± 5.0                                       | 135.5 ± 7.9            | 3.25 ± 0.25                           | 6                                |
| STOMAGEN OX                   | 126.4 ± 4.3                                     | 216.2 ± 5.5                                      | 0.368 ± 0.005             | 310.9 ± 6.7                                       | 130.9 ± 4.8            | 2.90 ± 0.10                           | 5                                |
| <i>erecta</i>                 | 98.9 ± 2.4                                      | 298.3 ± 8.3                                      | 0.250 ± 0.004             | 251.8 ± 5.5                                       | 145.7 ± 5.1            | 3.02 ± 0.23                           | 8                                |
| <i>tmm</i>                    | 33.4 ± 1.7                                      | 182.6 ± 4.2                                      | 0.153 ± 0.007             | 342.0 ± 7.4                                       | 137.5 ± 3.3            | 2.76 ± 0.17                           | 8                                |
| <i>tmm;erecta</i>             | 23.1 ± 5.4                                      | 231.4 ± 7.2                                      | 0.082 ± 0.018             | 333.6 ± 9.1                                       | 125.7 ± 3.0            | 2.90 ± 0.27                           | 4                                |
| <i>tmm;epf1</i>               | 27.4 ± 2.7                                      | 170.7 ± 2.6                                      | 0.135 ± 0.009             | 325.7 ± 7.0                                       | 129.6 ± 3.1            | 3.18 ± 0.11                           | 4                                |
| <i>tmm;epf2</i>               | 26.3 ± 2.5                                      | 173.0 ± 3.8                                      | 0.129 ± 0.009             | 321.3 ± 6.8                                       | 136.8 ± 3.8            | 3.70 ± 0.06                           | 4                                |
| <i>basl</i>                   | 91.7 ± 4.3                                      | 184.4 ± 9.9                                      | 0.333 ± 0.005             | 291.2 ± 8.2                                       | 147.2 ± 4.1            | 3.00 ± 0.18                           | 4                                |

**Table S2. Summary of cell anatomical features and leaf attributes for all controls and genotypes visualized using three-dimensional confocal microscopy. All values are mean ± SEM.**

| <b>Genotype</b>   | <b>SD:PMD Ratio</b> | <b>Comparison to <i>tmm</i></b> |
|-------------------|---------------------|---------------------------------|
| <i>tmm</i>        | 0.098 ± 0.006       | --                              |
| <i>erecta</i>     | 0.392 ± 0.014       | p < 0.001 ***                   |
| <i>epf1</i>       | 0.233 ± 0.010       | p < 0.001 ***                   |
| <i>epf2</i>       | 0.333 ± 0.030       | p < 0.01 **                     |
| <i>tmm;erecta</i> | 0.075 ± 0.043       | p = 1.00 ns                     |
| <i>tmm;epf1</i>   | 0.084 ± 0.007       | p = 0.2337 ns                   |
| <i>tmm;epf2</i>   | 0.083 ± 0.017       | p = 0.4606 ns                   |

**Table S3: Test of epistasis among signaling genotypes and double mutants using stomatal density (SD) to palisade mesophyll density (PMD) ratio.** All values are mean ± SEM. Notation in third column indicates significant difference from *tmm*, where not significant (ns) when P > 0.05, \* when P < 0.05, \*\* when P < 0.01, and \*\*\* when P < 0.001.
